# Supplementary material for: Aura Mapping: Where Vision and Somatosensation Meet
Source: Vision (Basel). 2021 Oct 30;5(4):52. doi: 10.3390/vision5040052 (PMC8628888; doi:10.3390/vision5040052)
Supplement: Supplementary file 1 [file vision-05-00052-s001.zip]

Archive with 4 entries (4 files):
- Supplementary Figure S1.pdf
- Supplementary Figure S2.pdf
- Supplementary Figure S3.pdf
- Supplementary Table S1_readonly.pdf
